# Supplementary material
Source: ML conference proceedings conference paper supplement (https://proceedings.mlr.press/v97/guo19a.html)
Supplement: Supplementary file [file guo19a-supp.pdf]

# Supplementary Material for Simple Black-box Adversarial Attacks

## S1 Experiment on CIFAR-10

In this section, we evaluate SimBA and SimBA-DCT on a ResNet-50 model trained on CIFAR-10. Both attacks remain very efficient on this new dataset without any hyperparameter tuning.

Figure S1 shows the distribution of queries required for a successful targeted attack to a random target label. In contrast to the experiment on ImageNet, the use of low frequency DCT basis is less effective due to the reduced image dimensionality. Both SimBA and SimBA-DCT perform similarly, with SimBA-DCT having a slightly heavier tail.

Table S1 shows aggregate statistics for the attack on CIFAR-10. Both methods achieve a success rate of 100% when limited to a maximum of 10,000 queries. The actual required queries is much fewer, with both methods averaging to approximately 300 queries, matching the median. SimBA-DCT has a slightly worse performance compared to SimBA due its query distribution having a slightly heavier tail. Nevertheless, the average query count is in line with state-of-the-art attacks on CIFAR-10. For instance, AutoZOOM achieves a mean query count of 259 with an average  $L_2$ -norm of 3.53.

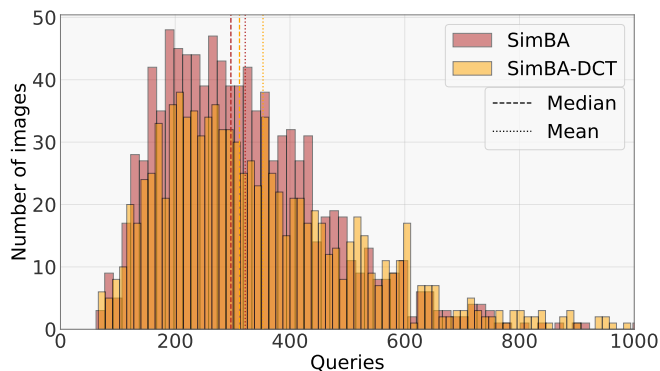

Figure S1: Histogram of number of queries required until a successful targeted attack on CIFAR-10 (over 1000 target images).

| Attack    | Average queries | Median queries | Average $L_2$ | Success rate |
|-----------|-----------------|----------------|---------------|--------------|
| SimBA     | 322             | 297            | 2.04          | 100%         |
| SimBA-DCT | 353             | 312            | 2.21          | 100%         |

Table S1: Average query count for SimBA and SimBA-DCT on CIFAR-10.

## S2 Additional image samples for attack on Google Cloud Vision

To demonstrate the generality of our evaluation of the Google Cloud Vision attack, we show 10 additional random images before and after perturbation by SimBA. In all cases, we successfully remove the top 3 original labels.

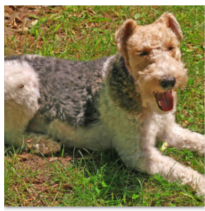

origin\_60.BMP

|                       |     |
|-----------------------|-----|
| Dog Breed             | 93% |
| Dog Like Mammal       | 91% |
| Dog                   | 90% |
| Lakeland Terrier      | 85% |
| Wire Hair Fox Terrier | 84% |
| Terrier               | 83% |
| Snout                 | 62% |
| Carnivoran            | 62% |
| Companion_Dog         | 60% |

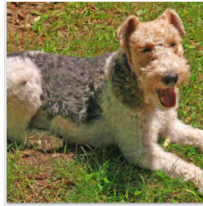

after\_60.BMP

|         |     |
|---------|-----|
| Grass   | 65% |
| Snout   | 63% |
| Terrier | 60% |

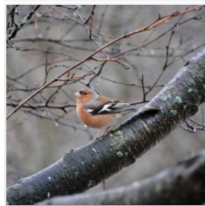

origin\_14.BMP

|               |     |
|---------------|-----|
| Bird          | 96% |
| Fauna         | 89% |
| Branch        | 84% |
| Tree          | 82% |
| Beak          | 80% |
| Perching Bird | 56% |
| Wildlife      | 55% |
| Twig          | 52% |

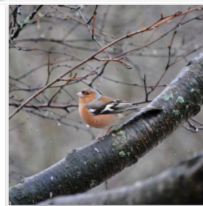

after\_14.BMP

|       |     |
|-------|-----|
| Tree  | 73% |
| Water | 52% |

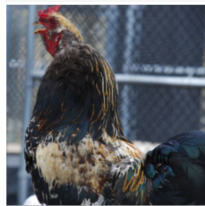

origin\_58.BMP

|             |     |
|-------------|-----|
| Chicken     | 98% |
| Beak        | 92% |
| Galliformes | 91% |
| Rooster     | 89% |
| Feather     | 81% |
| Fowl        | 79% |
| Poultry     | 74% |
| Bird        | 70% |
| Phasianidae | 58% |

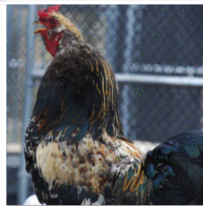

after\_58.BMP

|        |     |
|--------|-----|
| Snow   | 77% |
| Winter | 69% |

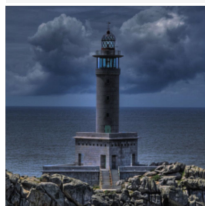

origin\_59.BMP

|            |     |
|------------|-----|
| Lighthouse | 98% |
| Tower      | 96% |
| Landmark   | 89% |
| Beacon     | 81% |
| Sky        | 78% |
| Promontory | 77% |
| Coast      | 59% |
| Sea        | 58% |
| Inlet      | 56% |

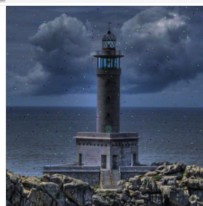

after\_59.BMP

|                    |     |
|--------------------|-----|
| Sky                | 78% |
| Sea                | 73% |
| Computer Wallpaper | 56% |

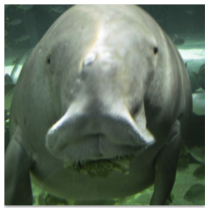

origin\_25.BMP

|                               |     |
|-------------------------------|-----|
| Marine Mammal                 | 95% |
| Fauna                         | 94% |
| Mammal                        | 93% |
| Wildlife                      | 82% |
| Terrestrial Animal            | 80% |
| Organism                      | 77% |
| Snout                         | 74% |
| Mouth                         | 71% |
| Whales Dolphins And Porpoises | 60% |

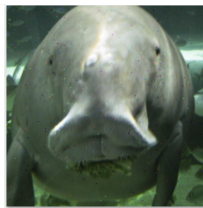

after\_25.BMP

|                    |     |
|--------------------|-----|
| Fish               | 94% |
| Ecosystem          | 91% |
| Fish               | 86% |
| Shark              | 75% |
| Mouth              | 69% |
| Cartilaginous Fish | 67% |
| Organism           | 67% |
| Marine Biology     | 63% |
| Jaw                | 53% |

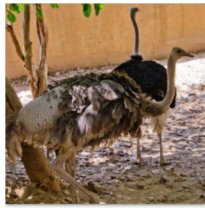

origin\_2.BMP

|                    |     |
|--------------------|-----|
| Ostrich            | 99% |
| Ratite             | 96% |
| Fauna              | 93% |
| Flightless Bird    | 87% |
| Beak               | 81% |
| Wildlife           | 76% |
| Bird               | 75% |
| Emu                | 72% |
| Terrestrial Animal | 62% |

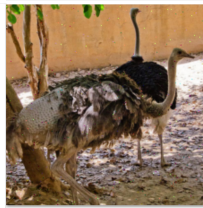

after\_2.BMP

|          |     |
|----------|-----|
| Wildlife | 51% |
|----------|-----|

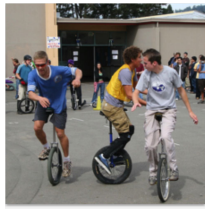

origin\_6.BMP

|                   |     |
|-------------------|-----|
| Cycle Sport       | 96% |
| Vehicle           | 91% |
| Mode Of Transport | 88% |
| Unicycle          | 85% |
| Bicycle           | 77% |
| Flatland Bmx      | 76% |
| Sports Equipment  | 75% |
| Freestyle Bmx     | 75% |
| Bmx Bike          | 73% |

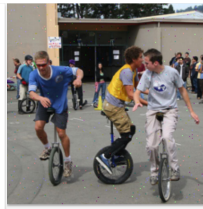

after\_6.BMP

|                  |     |
|------------------|-----|
| Vehicle          | 81% |
| Cycle Sport      | 80% |
| Sports Equipment | 72% |
| Unicycle         | 71% |
| Flatland Bmx     | 68% |
| Bicycle          | 68% |
| Bmx Bike         | 64% |
| Freestyle Bmx    | 64% |
| Recreation       | 58% |

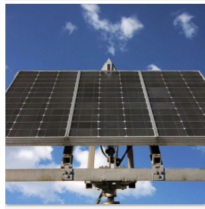

origin\_19.BMP

|              |     |
|--------------|-----|
| Sky          | 87% |
| Energy       | 84% |
| Solar Power  | 78% |
| Solar Energy | 72% |
| Technology   | 66% |
| Daylighting  | 63% |
| Roof         | 62% |
| Solar Panel  | 60% |
| Facade       | 56% |

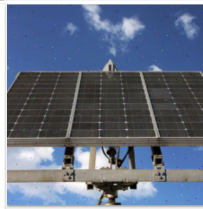

after\_19.BMP

|             |     |
|-------------|-----|
| Roof        | 54% |
| Daylighting | 53% |

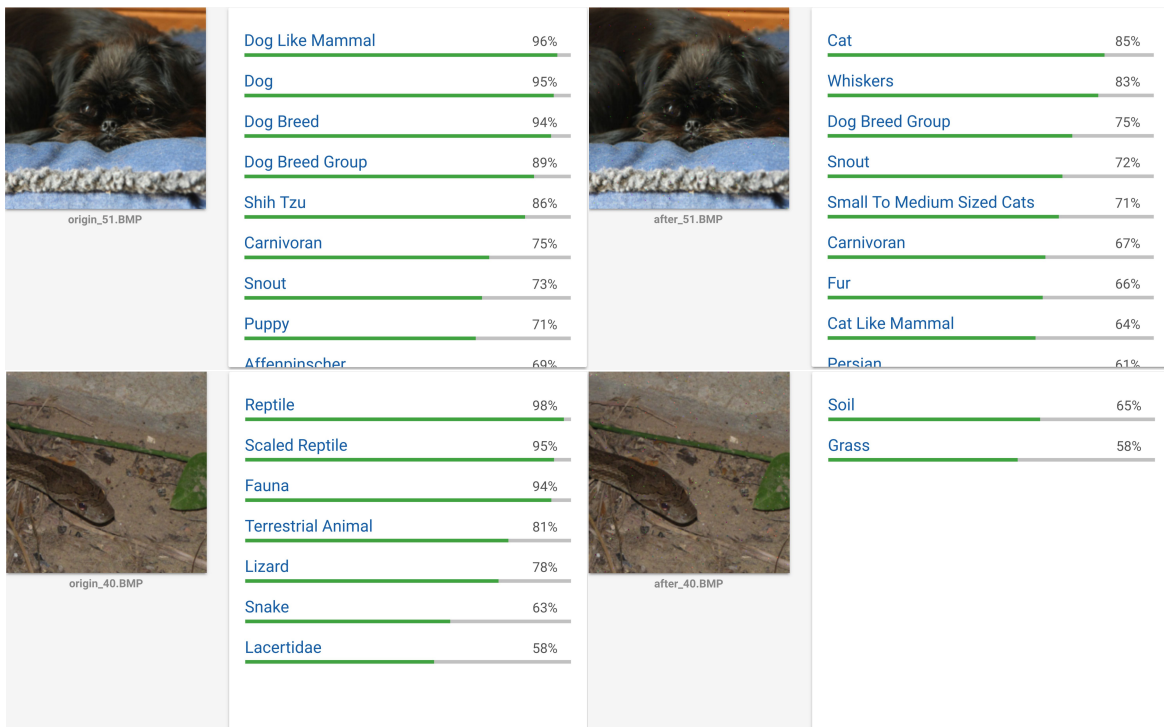

Figure S2: Additional adversarial images on Google Cloud Vision.
